## CORRESPONDENCE

Anesthesiology

1998; 88:283

© 1998 American Society of Anesthesiologists, Inc.

Lippincott-Raven Publishers

## Use of Labor-Delivery-Recovery Rooms

**To the Editor:**—A national survey supported by American Society of Anesthesiologists (ASA) and the American College of Obstetricians and Gynecologists (ACOG) questioned obstetricians and anesthesiologists about their practices on labor and delivery including use of labor-delivery-recovery (LDR) rooms.<sup>1</sup> Hospitals were grouped by the size of their delivery services: Stratum I =  $\geq 1,500$  deliveries per year, Stratum II = 500–1,499, and Stratum III =  $< 500$ . A stratified random sample of hospitals was drawn from the American Hospital Association registry, and 740 hospitals responded.

Overall, LDR rooms were used in 87% of the surveyed hospitals, with no differences between the smallest and largest delivery services. The types of procedures permitted are shown in table 1. Most hospitals allow spontaneous and forceps-assisted vaginal deliveries; roughly half allow complex vaginal deliveries (breech or twins), but a minority allow postpartum curettage or cesarean section. The smaller services are significantly more likely to allow forceps and breech deliveries to occur outside a traditional delivery or operating room. Although hospital policy may allow such procedures, the survey did not specifically ask how often LDR room were actually used for procedures such as cesarean section.

The anesthetics that are permitted in LDR rooms are shown in table 2. Essentially all services allow parenteral narcotics, and a majority allow regional techniques. However, spinal anesthesia with local anesthetics, inhalational analgesia, and general anesthesia are not permitted in most reporting services. Larger services are significantly more likely to allow epidural anesthetics, but significantly less likely to allow inhalational analgesia or general anesthesia to be performed. This may reflect the need for an anesthesia machine, which most units are unlikely to provide outside an operating room setting.

Labor-delivery-recovery rooms provide combined units with a more home-like setting, allowing freer interaction between the family and their newborn. ACOG and The American Academy of Pediatrics (AAP) have issued guidelines for equipping and staffing such facilities.<sup>2</sup>

**Table 1. The Type of Procedures That May Be Done in LDR Rooms**

|                      | Stratum I<br>( $\geq 1,500$ ) | Stratum II<br>(500–1,499) | Stratum III<br>( $< 500$ ) | Average |
|----------------------|-------------------------------|---------------------------|----------------------------|---------|
| SVD                  | 100                           | 100                       | 100                        | 100     |
| Low forceps          | 88                            | 98*                       | 98*                        | 95      |
| Mid forceps          | 58                            | 71*                       | 71*                        | 67      |
| Vaginal breech       | 38                            | 50                        | 60*                        | 51      |
| Twins                | 37                            | 48                        | 45                         | 45      |
| Cesarean section     | 3                             | 3                         | 7                          | 5       |
| Postpartum curettage | 29                            | 27                        | 23                         | 26      |

Values are percent of responses; values in parentheses are deliveries per year. Percentages do not add to 100% because more than one response could be checked.

LDR = SVD = spontaneous vaginal delivery.

\* Significantly different from Stratum I at  $P < 0.05$  (chi-square).

**Table 2. The Type of Analgesia/Anesthesia That May Be Provided in LDR Rooms**

|                           | Stratum I<br>( $\geq 1,500$ ) | Stratum II<br>(500–1,499) | Stratum III<br>( $< 500$ ) | Average |
|---------------------------|-------------------------------|---------------------------|----------------------------|---------|
| Parenteral medications    | 100                           | 100                       | 98                         | 99      |
| Paracervical block        | 79                            | 85                        | 87                         | 83      |
| Inhalational analgesia    | 9*                            | 12                        | 18                         | 13      |
| Epidural                  | 98*                           | 94*                       | 81                         | 91      |
| Spinal (opioids)          | 62                            | 57                        | 53                         | 57      |
| Spinal (local anesthesia) | 34                            | 38                        | 30                         | 34      |
| General anesthesia        | 7*                            | 10                        | 16                         | 11      |
| Other                     | 2                             | 6                         | 0                          | 3       |

Values are percent of responses; values in parentheses are deliveries per year. Percentages do not add to 100% because more than one response could be checked.

LDR =

\* Significantly different from Stratum III at  $P < 0.05$  (chi-square).

ties.<sup>2</sup> In contrast to traditional delivery rooms, there may not be an anesthesia machine or complete anesthesia cart immediately available, and the anesthetic techniques and delivery procedures permitted there vary depending on hospital policy. These data give an indication of clinical practices in LDR rooms in this country and may be helpful for services developing policies in this area.

**Joy L. Hawkins, M.D.**

**Charles P. Gibbs, M.D.**

**Miriam Orleans, Ph.D.**

**Brenda Beaty, M.S.P.H.**

University of Colorado Health Sciences Center

4200 East Ninth Avenue, B-113

Denver, Colorado 80262

JLHAWKINS@SKI.UHCOLORADO.EDU

## References

1. Hawkins JL, Gibbs CP, Orleans M, Martin-Salvaj G, Beaty B: Obstetric anesthesia work force survey, 1981 versus 1992. *ANESTHESIOLOGY* 1997; 87:135–43
2. American College of Obstetricians and Gynecologists, American Academy of Pediatrics: Perinatal care services: Obstetric functional units, Guidelines for Perinatal Care, 3rd edition. Washington, D.C., 1992, pp 12–20

(Accepted for publication August 13, 1997.)
